# Supplementary material
Source: PubMed Central journal article supplement (PMC3955378)
Supplement: milq0092-0063-sd1.pdf [file milq0092-0063-sd1.pdf]

## Appendix 1

| Conditions                            | CCS Category Numbers                   |
|---------------------------------------|----------------------------------------|
| Cancer                                | 11 through 45                          |
| Diabetes                              | 49, 50                                 |
| Hypertension                          | 98, 99                                 |
| Heart-related conditions              | 100, 101, 103, 104, 108, 109, 111, 112 |
| Respiratory (COPD and Asthma)         | 127, 128                               |
| Neurological (Back/Disc)              | 205                                    |
| Anxiety and Mood Disorders            | 651, 657                               |
| Alcohol and Substance Abuse Treatment | 660, 661                               |
| Skin-related conditions               | 197, 198, 199, 200                     |
| Orthopedic                            | 81, 202, 203, 204, 212, 226            |

## Appendix 2

### Health Status Binary Logit Models for Probability of Outcome (Table 2 models)

#### Fair or Poor Health Status

|           | Coef       | SE        | t      |
|-----------|------------|-----------|--------|
| age31x    | 0.0469174  | 0.0015109 | 31.05  |
| female    | 0.0633964  | 0.0374019 | 1.7    |
| white     | -0.4744492 | 0.0916517 | -5.18  |
| black     | -0.3652229 | 0.0984814 | -3.71  |
| asian     | -0.7340719 | 0.1224505 | -5.99  |
| hisp      | 0.2505697  | 0.0582598 | 4.3    |
| marry     | -0.1751033 | 0.044679  | -3.92  |
| neast     | -0.1230885 | 0.0730906 | -1.68  |
| south     | 0.0133487  | 0.0693473 | 0.19   |
| west      | 0.0196758  | 0.0690234 | 0.29   |
| msa       | -0.1462901 | 0.0554423 | -2.64  |
| incl138   | 1.505224   | 0.0565699 | 26.61  |
| inc138400 | 0.7930911  | 0.05398   | 14.69  |
| _cons     | -4.223368  | 0.1306557 | -32.32 |

#### Obese

|        | Coef       | SE        | t      |
|--------|------------|-----------|--------|
| age31x | 0.022064   | 0.0011907 | 18.53  |
| female | 0.0041564  | 0.0275134 | 0.15   |
| white  | -0.3216185 | 0.083642  | -3.85  |
| black  | 0.165832   | 0.0868167 | 1.91   |
| asian  | -1.735342  | 0.1114011 | -15.58 |
| hisp   | 0.1953887  | 0.0381314 | 5.12   |

|           |            |           |        |
|-----------|------------|-----------|--------|
| marry     | 0.0888061  | 0.0320788 | 2.77   |
| neast     | -0.2438149 | 0.0549784 | -4.43  |
| south     | -0.0656173 | 0.0539234 | -1.22  |
| west      | -0.2257662 | 0.0570945 | -3.95  |
| msa       | -0.2155587 | 0.0541699 | -3.98  |
| incl138   | 0.3293343  | 0.0420706 | 7.83   |
| inc138400 | 0.2034926  | 0.036612  | 5.56   |
| _cons     | -1.429344  | 0.1256241 | -11.38 |

### Anxiety or Mood Disorder

|           | Coef       | SE        | t      |
|-----------|------------|-----------|--------|
| age31x    | 0.0217532  | 0.0013537 | 16.07  |
| female    | 0.7384287  | 0.0368055 | 20.06  |
| white     | -0.0783968 | 0.1063521 | -0.74  |
| black     | -1.039507  | 0.1083581 | -9.59  |
| asian     | -1.489657  | 0.1491293 | -9.99  |
| hisp      | -0.8027021 | 0.0568664 | -14.12 |
| marry     | -0.3975419 | 0.0410652 | -9.68  |
| neast     | -0.1682135 | 0.0642261 | -2.62  |
| south     | -0.1604934 | 0.0622115 | -2.58  |
| west      | 0.0322003  | 0.0473825 | 0.68   |
| msa       | 0.1649056  | 0.0617705 | 2.67   |
| incl138   | 0.4226895  | 0.0462371 | 9.14   |
| inc138400 | 0.1310538  | 0.0402409 | 3.26   |
| _cons     | -2.724773  | 0.1325614 | -20.55 |

### Cancer

|           | Coef       | SE        | t      |
|-----------|------------|-----------|--------|
| age31x    | 0.0660371  | 0.0034507 | 19.14  |
| female    | 0.4120047  | 0.0772471 | 5.33   |
| white     | 0.5545408  | 0.247273  | 2.24   |
| black     | -0.2722522 | 0.2500417 | -1.09  |
| asian     | -0.8633502 | 0.289811  | -2.98  |
| hisp      | -0.915089  | 0.0970858 | -9.43  |
| marry     | 0.0567776  | 0.0791043 | 0.72   |
| neast     | 0.1814312  | 0.1010282 | 1.8    |
| south     | 0.1481086  | 0.0951769 | 1.56   |
| west      | 0.2045746  | 0.1206    | 1.7    |
| msa       | 0.1372017  | 0.0918393 | 1.49   |
| incl138   | -0.1628914 | 0.0914466 | -1.78  |
| inc138400 | -0.2263267 | 0.070307  | -3.22  |
| _cons     | -6.850118  | 0.3401688 | -20.14 |

### Diabetes

|        | Coef      | SE       | t     |
|--------|-----------|----------|-------|
| age31x | 0.0827708 | 0.002569 | 32.22 |

|           |            |           |        |
|-----------|------------|-----------|--------|
| female    | -0.0791475 | 0.058291  | -1.36  |
| white     | -0.7924453 | 0.1377432 | -5.75  |
| black     | -0.2640528 | 0.1414177 | -1.87  |
| asian     | -0.5804038 | 0.1556075 | -3.73  |
| hisp      | 0.3134938  | 0.0689283 | 4.55   |
| marry     | 0.0915793  | 0.0533508 | 1.72   |
| neast     | -0.0047928 | 0.0981361 | -0.05  |
| south     | 0.0145087  | 0.0757471 | 0.19   |
| west      | -0.1059831 | 0.0983081 | -1.08  |
| msa       | -0.1778346 | 0.0840784 | -2.12  |
| incl138   | 0.5681221  | 0.074791  | 7.6    |
| inc138400 | 0.3048615  | 0.0563153 | 5.41   |
| _cons     | -5.901966  | 0.2119271 | -27.85 |

### Cardiac

|           | Coef       | SE        | t     |
|-----------|------------|-----------|-------|
| age31x    | 0.0957498  | 0.0035881 | 26.69 |
| female    | -0.3949167 | 0.067149  | -5.88 |
| white     | -0.7009375 | 0.153215  | -4.57 |
| black     | -0.7557219 | 0.1681622 | -4.49 |
| asian     | -1.704478  | 0.2364459 | -7.21 |
| hisp      | -0.4210539 | 0.1021224 | -4.12 |
| marry     | 0.0693962  | 0.0688593 | 1.01  |
| neast     | -0.0981048 | 0.1053013 | -0.93 |
| south     | -0.0570133 | 0.0908259 | -0.63 |
| west      | -0.2153498 | 0.1272116 | -1.69 |
| msa       | -0.2164302 | 0.086931  | -2.49 |
| incl138   | 0.8829849  | 0.0804473 | 10.98 |
| inc138400 | 0.2318661  | 0.0702141 | 3.3   |
| _cons     | -6.8314    | 0.2689403 | -25.4 |

### Hypertension

|           | Coef       | SE        | t     |
|-----------|------------|-----------|-------|
| age31x    | 0.0961709  | 0.0016905 | 56.89 |
| female    | -0.1596783 | 0.0400977 | -3.98 |
| white     | -0.4294445 | 0.1160162 | -3.7  |
| black     | 0.146097   | 0.1192016 | 1.23  |
| asian     | -0.6518097 | 0.1288206 | -5.06 |
| hisp      | -0.1261716 | 0.0531103 | -2.38 |
| marry     | -0.0347916 | 0.044876  | -0.78 |
| neast     | -0.0570887 | 0.0640975 | -0.89 |
| south     | 0.1321719  | 0.0625825 | 2.11  |
| west      | -0.209725  | 0.063974  | -3.28 |
| msa       | -0.0667956 | 0.0508192 | -1.31 |
| incl138   | 0.2753114  | 0.046212  | 5.96  |
| inc138400 | 0.1359966  | 0.0355782 | 3.82  |

|       |           |          |        |
|-------|-----------|----------|--------|
| _cons | -5.407849 | 0.158616 | -34.09 |
|-------|-----------|----------|--------|

### Respiratory

|           | Coef       | SE        | t      |
|-----------|------------|-----------|--------|
| age31x    | 0.0185331  | 0.0018376 | 10.09  |
| female    | 0.5327445  | 0.0398789 | 13.36  |
| white     | -0.3288698 | 0.1252778 | -2.63  |
| black     | -0.7213058 | 0.1365047 | -5.28  |
| asian     | -1.386485  | 0.1580538 | -8.77  |
| hisp      | -0.7013169 | 0.0694767 | -10.09 |
| marry     | -0.1783307 | 0.0453516 | -3.93  |
| neast     | -0.0131654 | 0.0785741 | -0.17  |
| south     | -0.0817793 | 0.0660572 | -1.24  |
| west      | 0.0408976  | 0.0680566 | 0.6    |
| msa       | -0.0777753 | 0.0667452 | -1.17  |
| incl138   | 0.3664682  | 0.0573206 | 6.39   |
| inc138400 | 0.1420364  | 0.047951  | 2.96   |
| _cons     | -2.868292  | 0.1607526 | -17.84 |

### Neurological (Back/Disc)

|           | Coef       | SE        | t      |
|-----------|------------|-----------|--------|
| age31x    | 0.0227053  | 0.0016811 | 13.51  |
| female    | 0.1476388  | 0.0398818 | 3.7    |
| white     | 0.1114473  | 0.1352827 | 0.82   |
| black     | -0.4000425 | 0.131945  | -3.03  |
| asian     | -0.5905836 | 0.1664567 | -3.55  |
| hisp      | -0.4972456 | 0.0731982 | -6.79  |
| marry     | -0.0141657 | 0.0549657 | -0.26  |
| neast     | -0.1167789 | 0.0779896 | -1.5   |
| south     | -0.3369926 | 0.0693056 | -4.86  |
| west      | 0.0350445  | 0.0704934 | 0.5    |
| msa       | 0.0622685  | 0.0736652 | 0.85   |
| incl138   | 0.090526   | 0.0546951 | 1.66   |
| inc138400 | -0.0059262 | 0.0484762 | -0.12  |
| _cons     | -3.130759  | 0.1734961 | -18.05 |

### Orthopedic

|        | Coef       | SE        | t     |
|--------|------------|-----------|-------|
| age31x | 0.0590852  | 0.0014222 | 41.54 |
| female | 0.2963642  | 0.0305563 | 9.7   |
| white  | -0.293925  | 0.0971027 | -3.03 |
| black  | -0.5275856 | 0.1030372 | -5.12 |
| asian  | -1.065157  | 0.130379  | -8.17 |
| hisp   | -0.581163  | 0.060377  | -9.63 |
| marry  | -0.0659858 | 0.0371091 | -1.78 |
| neast  | -0.1129763 | 0.0953919 | -1.18 |

|           |            |           |        |
|-----------|------------|-----------|--------|
| south     | -0.025232  | 0.0830377 | -0.3   |
| west      | 0.2196574  | 0.0779986 | 2.82   |
| msa       | -0.0253156 | 0.0786695 | -0.32  |
| incl138   | 0.4275282  | 0.0518547 | 8.24   |
| inc138400 | 0.1584645  | 0.0481815 | 3.29   |
| _cons     | -3.847202  | 0.1361558 | -28.26 |

### **Dermatological (Skin-related condition)**

|           | Coef       | SE        | t      |
|-----------|------------|-----------|--------|
| age31x    | 0.0122525  | 0.0019258 | 6.36   |
| female    | 0.5378754  | 0.0498897 | 10.78  |
| white     | 0.0294777  | 0.1545353 | 0.19   |
| black     | -0.433762  | 0.1639835 | -2.65  |
| asian     | -0.6034294 | 0.20115   | -3     |
| hisp      | -0.6120434 | 0.0639989 | -9.56  |
| marry     | -0.2400254 | 0.06084   | -3.95  |
| neast     | 0.1289227  | 0.0766138 | 1.68   |
| south     | -0.0594126 | 0.0742413 | -0.8   |
| west      | 0.1550645  | 0.0837229 | 1.85   |
| msa       | 0.2641195  | 0.0797121 | 3.31   |
| incl138   | -0.5347226 | 0.064153  | -8.34  |
| inc138400 | -0.3528613 | 0.0497443 | -7.09  |
| _cons     | -3.019848  | 0.2127542 | -14.19 |

### **Alcohol and Substance Abuse Condition**

|           | Coef       | SE        | t     |
|-----------|------------|-----------|-------|
| age31x    | 0.0113554  | 0.0064704 | 1.75  |
| female    | -0.302281  | 0.1657838 | -1.82 |
| white     | -0.3061322 | 0.3276409 | -0.93 |
| black     | -1.20354   | 0.3872752 | -3.11 |
| asian     | -2.65201   | 0.8024389 | -3.3  |
| hisp      | -1.216323  | 0.2600785 | -4.68 |
| marry     | -0.5862933 | 0.1953876 | -3    |
| neast     | 0.1941598  | 0.2235454 | 0.87  |
| south     | -0.3875632 | 0.1898549 | -2.04 |
| west      | 0.1989955  | 0.2023955 | 0.98  |
| msa       | 0.5819776  | 0.2376038 | 2.45  |
| incl138   | 0.9136654  | 0.2048023 | 4.46  |
| inc138400 | 0.3492705  | 0.1795284 | 1.95  |
| _cons     | -5.48536   | 0.5516488 | -9.94 |

### Appendix 3

#### Generalized Linear Models of Annual Medical Spending and Medical Care Consumption (Table 3 models)

##### Inflation-adjusted Total Annual Spending

|           | Coef     | SE       | t     |
|-----------|----------|----------|-------|
| age31x    | 0.026694 | 0.00134  | 19.93 |
| female    | 0.500466 | 0.034018 | 14.71 |
| white     | 0.048113 | 0.095077 | 0.51  |
| black     | -0.13535 | 0.101429 | -1.33 |
| asian     | -0.56903 | 0.111901 | -5.09 |
| hisp      | -0.54519 | 0.058249 | -9.36 |
| marry     | 0.080187 | 0.03711  | 2.16  |
| neast     | -0.0187  | 0.05649  | -0.33 |
| south     | -0.17567 | 0.047847 | -3.67 |
| west      | -0.022   | 0.053033 | -0.41 |
| msa       | 0.059034 | 0.056739 | 1.04  |
| incl138   | -0.19842 | 0.046606 | -4.26 |
| inc138400 | -0.15588 | 0.037122 | -4.2  |
| obese     | 0.207141 | 0.031292 | 6.62  |
| fairpoor  | 1.037109 | 0.037482 | 27.67 |
| _cons     | 6.680149 | 0.133477 | 50.05 |

Estimated as GLM with log link and gamma family distribution assumption

##### Annual Number of Inpatient Discharges

|           | Coef     | SE       | t      |
|-----------|----------|----------|--------|
| age31x    | 0.000752 | 0.002391 | 0.31   |
| female    | 0.638837 | 0.053945 | 11.84  |
| white     | 0.011893 | 0.122969 | 0.1    |
| black     | 0.129502 | 0.122254 | 1.06   |
| asian     | -0.62132 | 0.170989 | -3.63  |
| hisp      | -0.32526 | 0.071106 | -4.57  |
| marry     | 0.423735 | 0.052226 | 8.11   |
| neast     | -0.15315 | 0.071332 | -2.15  |
| south     | -0.12028 | 0.06262  | -1.92  |
| west      | -0.2084  | 0.079047 | -2.64  |
| msa       | 0.052552 | 0.081161 | 0.65   |
| incl138   | 0.440975 | 0.064896 | 6.8    |
| inc138400 | 0.09767  | 0.066648 | 1.47   |
| obese     | 0.200201 | 0.051813 | 3.86   |
| fairpoor  | 1.15027  | 0.06044  | 19.03  |
| _cons     | -3.57413 | 0.182812 | -19.55 |

Estimated using Poisson regression

### Annual Number of ED Visits

|           | Coef     | SE       | t      |
|-----------|----------|----------|--------|
| age31x    | -0.0067  | 0.0015   | -4.47  |
| female    | 0.289862 | 0.037768 | 7.67   |
| white     | -0.0844  | 0.10563  | -0.8   |
| black     | 0.105351 | 0.114687 | 0.92   |
| asian     | -1.0173  | 0.132325 | -7.69  |
| hisp      | -0.26393 | 0.052349 | -5.04  |
| marry     | -0.10859 | 0.043274 | -2.51  |
| neast     | -0.01002 | 0.059687 | -0.17  |
| south     | -0.18157 | 0.050248 | -3.61  |
| west      | -0.1935  | 0.060909 | -3.18  |
| msa       | -0.03599 | 0.054488 | -0.66  |
| inclt138  | 0.502164 | 0.0538   | 9.33   |
| inc138400 | 0.218928 | 0.049887 | 4.39   |
| obese     | 0.258902 | 0.038751 | 6.68   |
| fairpoor  | 1.048131 | 0.044518 | 23.54  |
| _cons     | -1.91912 | 0.139228 | -13.78 |

Estimated using Negative Binomial regression

### Annual Number of Office-Based Visits

|           | Coef     | SE       | t      |
|-----------|----------|----------|--------|
| age31x    | 0.020968 | 0.001012 | 20.73  |
| female    | 0.62274  | 0.023327 | 26.7   |
| white     | 0.116067 | 0.072179 | 1.61   |
| black     | -0.29491 | 0.077377 | -3.81  |
| asian     | -0.50936 | 0.082638 | -6.16  |
| hisp      | -0.60241 | 0.046617 | -12.92 |
| marry     | -0.00089 | 0.026485 | -0.03  |
| neast     | 0.025812 | 0.048451 | 0.53   |
| south     | -0.17794 | 0.040802 | -4.36  |
| west      | 0.046663 | 0.042658 | 1.09   |
| msa       | 0.168489 | 0.040516 | 4.16   |
| inclt138  | -0.35231 | 0.037644 | -9.36  |
| inc138400 | -0.22975 | 0.024651 | -9.32  |
| obese     | 0.154466 | 0.02573  | 6      |
| fairpoor  | 0.813159 | 0.034448 | 23.61  |
| _cons     | 0.219819 | 0.105166 | 2.09   |

Estimated using Negative Binomial regression

### Annual Number of Prescribed Medicines

|        | Coef     | SE       | t     |
|--------|----------|----------|-------|
| age31x | 0.044559 | 0.000923 | 48.3  |
| female | 0.508725 | 0.023969 | 21.22 |
| white  | -0.01935 | 0.07157  | -0.27 |

|           |          |          |        |
|-----------|----------|----------|--------|
| black     | -0.40943 | 0.072059 | -5.68  |
| asian     | -0.75155 | 0.091845 | -8.18  |
| hisp      | -0.65998 | 0.043382 | -15.21 |
| marry     | -0.07349 | 0.024513 | -3     |
| neast     | -0.10149 | 0.042882 | -2.37  |
| south     | 0.013694 | 0.035009 | 0.39   |
| west      | -0.1473  | 0.035611 | -4.14  |
| msa       | -0.03861 | 0.039843 | -0.97  |
| incl138   | -0.04539 | 0.029735 | -1.53  |
| inc138400 | -0.08655 | 0.024631 | -3.51  |
| obese     | 0.403038 | 0.023044 | 17.49  |
| fairpoor  | 1.147076 | 0.024141 | 47.52  |
| _cons     | -0.09019 | 0.09397  | -0.96  |

Estimated using Negative Binomial regression
